# Supplementary material for: “Every Newborn-BIRTH” protocol: observational study validating indicators for coverage and quality of maternal and newborn health care in Bangladesh, Nepal and Tanzania
Source: PubMed Central journal article supplement (PMC6406050; doi:10.7189/jogh.09.01902), 2019-06
Supplement: jogh-09-010902-s001.pdf [file jogh-09-010902-s001.pdf]

**“Every Newborn Birth Indicator Research Tracking in Hospitals” (EN-BIRTH) Observational Study Protocol in Tanzania, Bangladesh and Nepal: Validating indicators for coverage and quality of maternal and newborn health care**

Supplementary On Line Materials

Contents

Annex 1: Authorship Group Information..... 2

Annex 2: Data regarding Sample Size Calculations ..... 6

Annex 3: Summary of ethics approvals ..... 8

## Annex 1: Authorship Group Information

### EN-BIRTH Expert Advisory Group members

| <b>Institution</b>                                                                                                                             | <b>Representative</b> |
|------------------------------------------------------------------------------------------------------------------------------------------------|-----------------------|
| Centres for Disease Control and Prevention                                                                                                     | Florina Serbanescu    |
| Countdown/International Confederation of Midwives/Johns Hopkins University                                                                     | Agbessi Amouzou       |
| District Health Information System 2                                                                                                           | Johan Ivar Sæbø       |
| International Federation of Gynecology and Obstetrics /Royal College of Obstetricians and Gynaecologists/Liverpool School of Tropical Medicine | Matthews Mathai       |
| Maternal Child Survival Program                                                                                                                | Barbara Rawlins       |
| MEASURE Evaluation                                                                                                                             | Tariq Azim            |
| United Nations Population Fund                                                                                                                 | Jean-Pierre Monet     |
| United Nations Children's Fund                                                                                                                 | Nabila Zaka           |
| United Nations Children's Fund                                                                                                                 | Debra Jackson         |
| United States Agency for International Development                                                                                             | Pavani Ram            |
| World Health Organization                                                                                                                      | Allisyn Moran         |
| Save the Children                                                                                                                              | Lara Vaz              |
| World Health Organization, Tanzania                                                                                                            | Dr Theopista John     |

**EN-BIRTH study Research Design Windsor Workshop Participants (not already named in above author groups)**

| Institution                                                                              | Representative         | Named in authorship group |
|------------------------------------------------------------------------------------------|------------------------|---------------------------|
| American Academy of Pediatrics                                                           | Susan Niermeyer        | Yes                       |
| Aga Khan University                                                                      | Jai Das                | Yes                       |
| Applying Science to Strengthen and Improve Systems                                       | Tamar Chitashvili      | No                        |
| The Children's Investment Fund Foundation                                                | Suzanne Fournier       | Yes                       |
| The Children's Investment Fund Foundation                                                | Ly Nguyen              | No                        |
| Global Alliance to Prevent Prematurity and Stillbirth                                    | James A. Litch         | Yes                       |
| Georgetown University                                                                    | Indira Narayanan       | Yes                       |
| International Centre for Diarrhoeal Disease Research, Bangladesh                         | Elahi Chowdhury        | Yes                       |
| Ipas Bangladesh                                                                          | Sayed Rubayet          | Yes                       |
| JHPIEGO                                                                                  | Mary Drake             | No                        |
| Liverpool School of Tropical Medicine                                                    | Juan Dewez             | No                        |
| London School of Hygiene and Tropical Medicine                                           | Amanda Cleeve          | No                        |
| London School of Hygiene and Tropical Medicine                                           | Maya Kohli-Lynch       | No                        |
| London School of Hygiene and Tropical Medicine                                           | Kate Milner            | Yes                       |
| London School of Hygiene and Tropical Medicine (IDEAS)                                   | Joanna Schellenberg    | Yes                       |
| London School of Hygiene and Tropical Medicine                                           | Gaurav Sharma          | Yes                       |
| London School of Hygiene and Tropical Medicine                                           | Cally Tann             | Yes                       |
| Maternal Child Survival Program                                                          | Goldy Mazia            | Yes                       |
| Maternal Health Task Force                                                               | Rima Jolivet           | Yes                       |
| MEASURE Evaluation                                                                       | Kavita Singh           | Yes                       |
| PATH                                                                                     | Patricia S. Coffey     | Yes                       |
| Progressive Development Initiative                                                       | Simon Azariah          | Yes                       |
| Save the Children                                                                        | Mary Kinney            | No                        |
| Save the Children                                                                        | Dyson Likomwa          | Yes                       |
| Save the Children                                                                        | Steve Wall             | Yes                       |
| SickKids                                                                                 | Amira Khan             | Yes                       |
| Ministry of Health, Tanzania                                                             | Mary Azayo             | No                        |
| United Nations Population Fund                                                           | Luc De Bernis          | No                        |
| United Nations Population Fund                                                           | Michel Brun            | No                        |
| United Nations Population Fund/International Confederation of Midwives                   | Petra Ten Hoope Bender | No                        |
| University of Calgary                                                                    | Nalini Singhal         | Yes                       |
| University of Ibadan                                                                     | Adejumoke Idowu Ayede  | Yes                       |
| University of Malawi                                                                     | Queen Dube             | Yes                       |
| University of Nairobi                                                                    | Alfred Osoti           | Yes                       |
| University of Oslo                                                                       | Wilfred Senyoni        | Yes                       |
| University of Oslo                                                                       | Ola Titlestad          | No                        |
| University of Pretoria                                                                   | Anne-Marie Bergh       | Yes                       |
| United States Agency for International Development                                       | Troy Jacobs            | No                        |
| World Health Organization/ Every Newborn Action Plan                                     | Olive Cocoman          | Yes                       |
| World Health Organization                                                                | Jon Simon              | No                        |
| World Health Organization                                                                | John Grove             | Yes                       |
| Collaborating Centre for Education & Research in Newborn Care, World Health Organization | Ashok Deorari          | Yes                       |

## Working Group Participants EN-BIRTH study Research Design Windsor Workshop

| WORKING GROUP                                                                                 | FACILITATORS                                          | PARTICIPANTS                                                                                                                                                                                                                                                                   |
|-----------------------------------------------------------------------------------------------|-------------------------------------------------------|--------------------------------------------------------------------------------------------------------------------------------------------------------------------------------------------------------------------------------------------------------------------------------|
| <b>DAY 1, SESSION A</b>                                                                       |                                                       |                                                                                                                                                                                                                                                                                |
| 1. Uterotonics                                                                                | Allisyn Moran & Rima Jolivet                          | Georgia Gore-Langton, Gaurav Sharma, Elahi Chowdhury, Matthews Mathai, Luc De Bernis, Agbessi Amouzou, Honorati Masanja, Wilfred Senyoni                                                                                                                                       |
| 2. KMC                                                                                        | Goldy Mazia & Sarah Moxon                             | Theopista John, Simon Cousens, Suzanne Fournier, Lara Vaz, Kate Milner, Shams El Arifeen, Ashok Deorari, Queen Dube, Dyson Likomwa, Anne-Marie Bergh, Amanda Cleeve, Debra Jackson                                                                                             |
| 3. Resuscitation                                                                              | KC Ashish & Harriet Ruysen                            | Angela Baschieri, Maya Kohli Lynch, Tariq Azim, Mary Azayo, Michel Brun, Trish Coffey, Mary Drake, Vladimir Gordeev, Indira Narayanan, Barbara Rawlins, Kavita Singh, Tazeen Tahsina, Ola Titlestad, Ly Nguyen                                                                 |
| 4. Treatment of pSBI/neonatal infections                                                      | Troy Jacobs & Steve Wall                              | Rubayet Sayed, Nalini Singhal, Tamar Chitashvili, Juan Dewez, Ehsan Rahman, Jon Simon, Amira Khan , A I Ayede, Jai Das, Joanna Schellenberg, Hannah Blencowe, Debra Sitrin (remotely).                                                                                         |
| 5. Antenatal corticosteroids                                                                  | Alfred Osoti, Jim Litch, Joy Lawn                     | Cally Tann, Dorothy Boggs, Florina Seabescu, Oliva Cocoman                                                                                                                                                                                                                     |
| <b>DAY 2, SESSION B</b>                                                                       |                                                       |                                                                                                                                                                                                                                                                                |
| 1. Denominator options for testing.                                                           | Hannah Blencowe, Simon Cousens & Angela Baschieri     | Vladimir Gordeev, Joy Lawn, Michel Brun, Tamar Chitashvili, Mary Drake, Tazeen Tahsina, Ola Titlestad, Matthews Mathai, Luc De Bernis, Florina Sebanescu, Jai Das, Alfred Osoti                                                                                                |
| 2. Training observers                                                                         | Barbara Rawlins & Tariq Azim                          | Mary Azayo, I. Ayede, Amanda Cleeve, Goldie Mazia, Indira Narayanan                                                                                                                                                                                                            |
| 3. Filming, including ethics, methods, and analysis                                           | Allisyn Moran & KC Ashish                             | Gaurav Sharma, Nalini Singhal, Shams El Arifeen, Joanna Schellenberg, Queen Dube.                                                                                                                                                                                              |
| 4. Pre-discharge interviews to assess maternal recall                                         | Agbessi Amouzou & Kavita Singh                        | Harriet Ruysen, Amira Khan Rubayet Sayed, Theopista Johns,                                                                                                                                                                                                                     |
| 5. Qualitative health-worker interviews to assess barriers and facilitators to data recording | Lara Vaz & Anne Marie Bergh                           | Susan Niermeyer, Juan Dewez, Sarah Moxon                                                                                                                                                                                                                                       |
| 6. Knowledge management/ dissemination                                                        | Olive Cocoman & Dorothy Boggs                         | Georgia Gore-Langton, Troy Jacobs, Wilfred Senyoni, Ashok Deorari, Debra Jackson                                                                                                                                                                                               |
| <b>DAY 2, SESSION C</b>                                                                       |                                                       |                                                                                                                                                                                                                                                                                |
| 1. Data collection, database design and checks, plan for analysis                             | Joanna Schellenberg, Simon Cousens & Shams El-Arifeen | Vladimir Gordeev, Angela Baschieri, Ashish Kc, Susan Niermeyer, Tariq Azim, Tamar Chitashvili, Honorati Masanja.                                                                                                                                                               |
| 2. Service readiness for small & sick newborns (linked to EmOC)                               | Sarah Moxon & Queen Dube                              | Georgia Gore-Langton, Lara Vaz, Juan Dewez, Ehsan Rahman, Queen Dube, Nalini Singhal, Anne-Marie Bergh, Michel Brun, Mary Azayo, Steve Wall, Rubayet Sayet, Indira Narayanan, Al Ayede and Goldy Mazia. In addition Neal Russell, Ashok Deorari and Hannah Blencowe (remotely) |
| 3. Perinatal audit (linked to MDSR)                                                           | Matthews Mathai, Florina Sebanescu                    | Theophista Johns, Luc De Burnis, Jon Simons                                                                                                                                                                                                                                    |

|                                                           |                                 |                                                                                           |
|-----------------------------------------------------------|---------------------------------|-------------------------------------------------------------------------------------------|
| 4. DHIS platforms and linking to these from the start     | Ola Titlestad & Wilfred Senyoni | Steve Wall, Agbessi Amouzou, Rima Jolivet, Hattie Ruysen, Olive Cocoman, Theopista Johns. |
| 5. Birth certificate registration for all facility births | Debra Jackson & Joy Lawn        | Tazeen Tahsina, Dorothy Boggs                                                             |
| 6. Birth weight measurement for all facility births       | Hannah Blencowe & Ashok Deorari | Gaurav Sharma                                                                             |

## Annex 2: Data regarding Sample Size Calculations

**Supplementary Table 1: Estimated prevalence of coverage of selected maternal/newborn interventions from global literature**

| INDICATOR                                                                | ASSUMED NEED                                                                                                                           | LIKELY COVERAGE OF INTERVENTION                                                                                                                 | EXPECTED PREVALENCE OF INTERVENTION PRACTICE                                                 |
|--------------------------------------------------------------------------|----------------------------------------------------------------------------------------------------------------------------------------|-------------------------------------------------------------------------------------------------------------------------------------------------|----------------------------------------------------------------------------------------------|
| <b>Uterotonic use for 3<sup>rd</sup> stage of labour</b>                 | All women who give birth.                                                                                                              | High for facility births                                                                                                                        | High (target all births, high coverage).                                                     |
| <b>Antenatal corticosteroid (ACS) use</b>                                | Preterm prevalence in Tanzania (11%) and Bangladesh (14%).<br>Approximately 25% of preterm births are <34 weeks gestational age [1].   | Low (e.g. IQR 30-68%) [2]                                                                                                                       | Approximately 0.4-0.5% of all births.                                                        |
| <b>Newborn resuscitation</b>                                             | Approximately 3% of births require resuscitation with bag and mask [3].                                                                | HBB wide scale up in both Tanzania and Bangladesh.<br>Moderate - approximately 50% of facility born neonates receive resuscitation when needed. | Approximately 1-2% of all births.                                                            |
| <b>Kangaroo mother care (KMC)</b>                                        | Approximately 20% of live births in Bangladesh and 10% in Tanzania are <2,000g.                                                        | Tanzania low to moderate - approximately 20%.<br>Bangladesh - very low approximately <10% [4].                                                  | Tanzania - approximately 2% of live births<br>Bangladesh - approximately 2% of live births.  |
| <b>Treatment of neonatal possible serious bacterial infection (PSBI)</b> | Approximately 7% of live births during neonatal period [5].<br>>70% of deaths attributed to neonatal infections are in first week [6]. | Tanzania - moderate as wide scale up of IMNCI - approximately 40%.<br>Bangladesh - low/moderate - approximately 40% of those in facilities.     | Tanzania - approximately 3% of live births.<br>Bangladesh - approximately 3% of live births. |

## References

- 1 Blencowe H, Cousens S, Oestergaard MZ, Chou D, Moller A-B, Narwal R, et al. National, regional, and worldwide estimates of preterm birth rates in the year 2010 with time trends since 1990 for selected countries: a systematic analysis and implications. *The Lancet*. 2012;379:2162-72.
- 2 Vogel JP, Souza JP, Gülmezoglu AM, Mori R, Lumbiganon P, Qureshi Z, et al. Use of antenatal corticosteroids and tocolytic drugs in preterm births in 29 countries: an analysis of the WHO Multicountry Survey on Maternal and Newborn Health. *The Lancet*. 2014;384:1869-77.
- 3 Lee AC, Cousens S, Wall SN, Niermeyer S, Darmstadt GL, Carlo WA, et al. Neonatal resuscitation and immediate newborn assessment and stimulation for the prevention of neonatal deaths: a systematic review, meta-analysis and Delphi estimation of mortality effect. *BMC public health*. 2011;11:S12.
- 4 Vesel L, Bergh A-M, Kerber KJ, Valsangkar B, Mazia G, Moxon SG, et al. Kangaroo mother care: a multi-country analysis of health system bottlenecks and potential solutions. *BMC pregnancy and childbirth*. 2015;15:S5.
- 5 Seale AC, Blencowe H, Manu AA, Nair H, Bahl R, Qazi SA, et al. Estimates of possible severe bacterial infection in neonates in sub-Saharan Africa, south Asia, and Latin America for 2012: a systematic review and meta-analysis. *The Lancet infectious diseases*. 2014;14:731-41.
- 6 Oza S, Lawn JE, Hogan DR, Mathers C, Cousens SN. Neonatal cause-of-death estimates for the early and late neonatal periods for 194 countries: 2000–2013. *Bulletin of the World Health Organization*. 2015;93:19-28.

**Supplementary Table 2: Formative Phase Data by country and facility site used to inform EN-BIRTH study sample size**

| Country    | Facility                                                   | Average annual births | uterotonic      | Resus        | KMC        | Neonatal infection treatment                                        |
|------------|------------------------------------------------------------|-----------------------|-----------------|--------------|------------|---------------------------------------------------------------------|
| Tanzania   | Muhimbili National Hospital, Dar es Salaam                 | 9,773                 | n=9,773 (100%)  | n=560 (5.7%) | 432 (4.4%) | >80% of neonates admitted to neonatal ward treated with antibiotics |
|            | Temeke Regional Hospital Dar es Salaam                     | 14,655                | n=14,655 (100%) | n=488 (3.3%) | 564 (3.8%) | 651 newborns admitted to neonatal ward                              |
| Bangladesh | Maternal and Child Health Training Institute (MCHTI) Dhaka | 4,488                 | n=3,270 (73%)   | n=224 (5%)   | 50 (1.1%)  | -                                                                   |
|            | Kushtia District Hospital (DH) Kushtia                     | 2,581                 | n=2,064 (80%)   | n=130 (5%)   | 120 (4.6%) | 472                                                                 |
| Nepal      | Pokhara Academy of Health Sciences Pokhara                 | 9,427                 | n=9377 (99%)    | n=235 (2.5%) | 250 (2.6%) | >80% of neonates admitted to neonatal ward treated with antibiotics |

Note: ACS recording is more limited and data are not shown in this table

Source: Data collected in formative phase from Facility reports, 2016

**Supplementary Table 3: EN-BIRTH Sample size calculation**

| INDICATOR                              | ASSUMED PREVALENCE | EXPECTED SENSITIVITY | EXPECTED SPECIFICITY | DESIRED PRECISION | CONFIDENCE LEVEL | SENSITIVITY SAMPLE SIZE | +10% NON-CONSENT | SPECIFICITY SAMPLE SIZE | +10% NON-CONSENT |
|----------------------------------------|--------------------|----------------------|----------------------|-------------------|------------------|-------------------------|------------------|-------------------------|------------------|
| <b>Uterotonic Use</b>                  | 0.80               | 0.50                 | 0.50                 | 0.10              | 95%              | 122                     | 136              | 486                     | 540              |
| <b>ACS</b>                             | 0.005              | 0.50                 | 0.50                 | 0.10              | 95%              | 19401                   | 21556            | 98                      | 109              |
| <b>Newborn resuscitation</b>           | 0.02               | 0.50                 | 0.50                 | 0.10              | 95%              | <b>4851</b>             | <b>5390</b>      | 99                      | 110              |
| <b>KMC</b>                             | 0.02               | 0.50                 | 0.50                 | 0.10              | 95%              | <b>4851</b>             | <b>5390</b>      | 99                      | 110              |
| <b>Treatment of neonatal infection</b> | 0.03               | 0.50                 | 0.50                 | 0.10              | 95%              | 3234                    | 3593             | 101                     | 113              |

## Annex 3: Summary of ethics approvals

**Supplementary Table 3: Summary of EN-BIRTH IRB approvals with dates and references numbers**

| <b>EN-BIRTH IRB</b>                         | <b>APPROVAL DATE</b> | <b>REFERENCE NUMBER</b>   |
|---------------------------------------------|----------------------|---------------------------|
| <b>LSHTM</b>                                |                      |                           |
| LSHTM IRB                                   | 3 October 2016       | 11780                     |
| <b>TANZANIA</b>                             |                      |                           |
| IHI IRB                                     | 20 October 2016      | 032-2016                  |
| MUHAS IRB                                   | 21 October 2016      | 2016-10-21/AEC/Vol.XI/310 |
| National institute for medical research IRB | 20 January 2017      | NIMR/HQ/R.8a/Vol.IX/2394  |
| <b>NEPAL</b>                                |                      |                           |
| Nepal health research council               | 8 August 2016        | 187 /2016                 |
| <b>BANGLADESH</b>                           |                      |                           |
| ICDDR,B research review committee           | 11 August 2016       | PR-16055                  |
| ICDDR,B ethical review committee            | 14 November 2016     | PR-16055                  |
